# Supplementary material for: Correlation between the spin effect and catalytic activity of two-dimensional metal organic frameworks for the oxygen evolution reaction
Source: Royal Society of Chemistry journal article supplement (doi:10.1039/d4ta05700g), 2024-01-01
Supplement: d4ta05700g1.pdf [file d4ta05700g1.pdf]

## **Supporting Information**

# **Correlation between Spin Effect and Catalytic Activity of Two Dimensional Metal Organic Frameworks for Oxygen Evolution Reaction**

Feifan Wang, Liang Hu and Yu Jing\*

<sup>1</sup>Jiangsu Co-Innovation Centre of Efficient Processing and Utilization of Forest Resources, College of Chemical Engineering, Nanjing Forestry University, Nanjing 210037, China

Email:

yujing@njfu.edu.cn

## Computational methods

All the simulations were explored based on density functional theory (DFT) using the Vienna *Ab initio* simulation package (VASP).<sup>1,2</sup> The projector augmented wave (PAW)<sup>3</sup> method and Perdew–Burke–Ernzerhof (PBE) functional within the generalized gradient approximation (GGA) for the exchange–correlation energy were considered.<sup>4</sup> The wave functions of the simulated systems were expanded in a plane-wave basis with the energy cutoff as 420 eV, and the Monkhorst–Pack  $k$ -point mesh in the Brillouin zone was set to be  $3 \times 3 \times 1$  and  $11 \times 11 \times 1$  for the total energy and density of states calculations, respectively. The convergence criterion was set to be 0.01 eV·Å<sup>-1</sup> and 10<sup>-5</sup> eV for force and energy of the studied system, respectively, within the conjugated gradient method for geometry optimization. DFT+U methods were applied to describe the localized 3d electron correlation of transition metals (TM) by taking the difference between the Coulomb  $U$  and exchange  $J$  parameter ( $U_{\text{eff}} = U - J$ ) into account, with  $U_{\text{eff}}$  value of 4.0, 3.8, 4.4, 4.0, 4.0, and 4.0 eV<sup>5-9</sup> for Fe, Co, Ni, Mn, Cr, and Ti atoms, respectively. To describe the effects of the long-range van der Waals interactions, a semiclassical dispersion correction scheme (DFT-D3) was used.<sup>10</sup> The solvation treatment method of VASPsol, which well express the long-range electrostatic interaction and the average properties of the solvent were used. The vacuum layer is set to be 20 Å to avoid interaction between two neighboring images.

The formation energy ( $E_f$ ) of monolayers was estimated according by

$$E_f = E_{\text{M}_3(\text{HAT})_2} - 2E_{\text{HAT}} - 3E_{\text{TM}}, \quad (\text{S1})$$

where  $E_{\text{M}_3(\text{HAT})_2}$ ,  $E_{\text{HAT}}$  and  $E_{\text{TM}}$  are the total energy of the  $\text{M}_3(\text{HAT})_2$  monolayer, HAT molecule, and central metal, respectively.

The  $d$  band center ( $\varepsilon_d$ ) value can be given by:

$$\varepsilon_d = \frac{\int_{-\infty}^{+\infty} \rho(E)(E - E_f)dE}{\int_{-\infty}^{+\infty} (E - E_f)dE} \quad (\text{S2})$$

where  $\rho(E)$  is the DOS projected on the  $d$ -states of the metal atoms and  $E_f$  is the Fermi

energy of the system.

The desorption energy ( $\Delta E_{\text{des}}$ ) of  $\text{O}_2$  on the monolayer can be calculated by

$$\Delta E_{\text{des}} = E_{\text{ads}} + E_{\text{sub}} - E_{\text{ads/sub}}, \quad (\text{S3})$$

where  $E_{\text{ads/sub}}$  is the total energy of the  $\text{M}_3(\text{HAT})_2$  monolayer with  $\text{OO}^*$  adsorption intermediates.  $E_{\text{ads}}$  and  $E_{\text{sub}}$  are the total energy of  $\text{O}_2$  and the pristine  $\text{M}_3(\text{HAT})_2$  substrate, respectively.

The overall OER process in the acid environment can be described as follows:

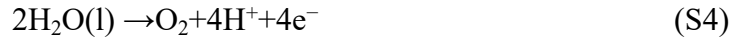

and the elementary reaction steps for the  $4\text{e}^-$  pathway are shown below:

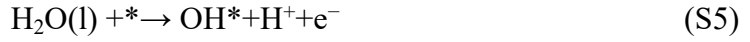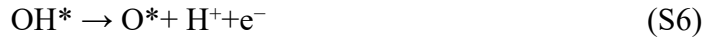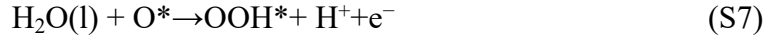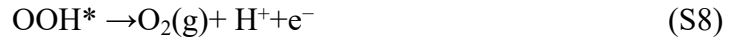

where the “\*” denotes the active site of the catalyst. (l) and (g) refer to liquid and gas phase.

In the first step, a  $\text{H}_2\text{O}$  molecule is captured by the catalyst substrate “\*”, followed by the release of a proton and an electron, leading to the formation of  $\text{*OH}$  (eq S5). Then, another proton and electron separate from  $\text{*OH}$ , forming the  $\text{*O}$  intermediate (eq S6). In the third step, another  $\text{H}_2\text{O}$  molecules react with  $\text{O}^*$  to generate  $\text{OOH}^*$ , accompanied by the release of a proton and electron (eq S7). Finally, the  $\text{O}_2$  molecules are generated from  $\text{*OOH}$ , producing the final proton and electron (eq S8).

The thermochemistry of OER is interpreted by using the CHE model developed by Nørskov and co-workers to calculate the Gibbs reaction free energy,<sup>11</sup> which defines the free energy of  $\text{H}^+ + \text{e}^-$  as that of  $1/2\text{H}_2$  under standard conditions. For each step, the Gibbs free energy change ( $\Delta G$ ) is defined by the following equation:

$$\Delta G = \Delta E - T\Delta S + \Delta ZPE + \Delta G_U + \Delta G_{\text{pH}} \quad (\text{S9})$$

where  $\Delta E$ ,  $\Delta ZPE$ , and  $\Delta S$  represent the total energy difference, zero-point energy change, and entropy change, respectively. The values for  $\Delta ZPE$  and  $\Delta S$  were obtained from the vibrational frequency calculations, while the entropy of  $\text{H}_2$  and  $\text{H}_2\text{O}$  can be

obtained directly from the standard thermodynamic database.  $T$  represents for the temperature and is taken as 298.15 K.  $\Delta G_U$  is determined by the applied external potential  $U$  to the standard electrode and can be expressed as  $\Delta G_U = -eU$ .  $\Delta G_{\text{pH}}$  represents the Gibbs free energy change correlated to the  $\text{H}^+$  concentrations, which is determined by  $\Delta G_{\text{pH}} = k_{\text{B}}T \times \ln 10 \times \text{pH}$ ,  $k_{\text{B}}$  refers to the Boltzmann constant and pH is assumed to be 0 in an acidic medium.

The Gibbs free energy changes of the four steps in eq S5–S8 are  $\Delta G_1$ ,  $\Delta G_2$ ,  $\Delta G_3$ , and  $\Delta G_4$ , respectively. The overpotential ( $\eta$ ) is given by the following equations:

$$\eta = (\max [\Delta G_1, \Delta G_2, \Delta G_3, \Delta G_4]/e) - 1.23\text{V} \quad (\text{S10})$$

**Table S1** Lattice parameter ( $a$ , Å), pore size ( $D_M$ , Å), formation energy ( $E_f$ , eV), magnetic moments on M ion ( $M_m$ ,  $\mu B$ ) and system ( $M_{tol}$ ,  $\mu B$ ), the value of  $d$ -band center ( $\varepsilon_d$ ) and charge transfer ( $q$ ,  $|e|$ ) of  $M_3(HAT)_2$  monolayer.

|               | Magnetic ground state | Lattice | $D_M$ | $E_f$  | $M_m$ | $M_{tol}$ | $\varepsilon_d$ | $\Delta q$ |
|---------------|-----------------------|---------|-------|--------|-------|-----------|-----------------|------------|
| $Fe_3(HAT)_2$ | spin                  | 14.24   | 7.05  | -7.59  | 3.66  | 10.31     | -2.28           | -0.86      |
|               | nonspin               | 13.75   | 6.87  | -2.51  | -     | -         | -0.61           | -1.25      |
| $Co_3(HAT)_2$ | spin                  | 14.24   | 7.19  | -3.37  | 2.37  | 6.53      | -1.97           | -0.74      |
|               | nonspin               | 13.82   | 6.91  | -2.61  | -     | -         | -1.17           | -0.94      |
| $Ni_3(HAT)_2$ | spin                  | 14.09   | 7.05  | -1.84  | 1.04  | 3.54      | -1.69           | -0.81      |
|               | nonspin               | 13.68   | 6.84  | -0.41  | -     | -         | -3.32           | -0.56      |
| $Mn_3(HAT)_2$ | spin                  | 14.38   | 7.19  | -10.12 | 4.58  | 12.00     | -1.22           | -1.04      |
|               | nonspin               | 13.75   | 6.87  | -1.12  | -     | -         | -0.20           | -1.38      |
| $Cr_3(HAT)_2$ | spin                  | 14.19   | 7.09  | -9.59  | 3.76  | 8.59      | -0.03           | -1.04      |
|               | nonspin               | 14.02   | 7.02  | -0.04  | -     | -         | 0.48            | -1.27      |
| $Ti_3(HAT)_2$ | spin                  | 14.28   | 7.14  | -7.25  | 1.62  | 2.15      | 0.98            | -1.48      |
|               | nonspin               | 14.25   | 7.12  | -4.78  | -     | -         | 0.25            | -1.33      |

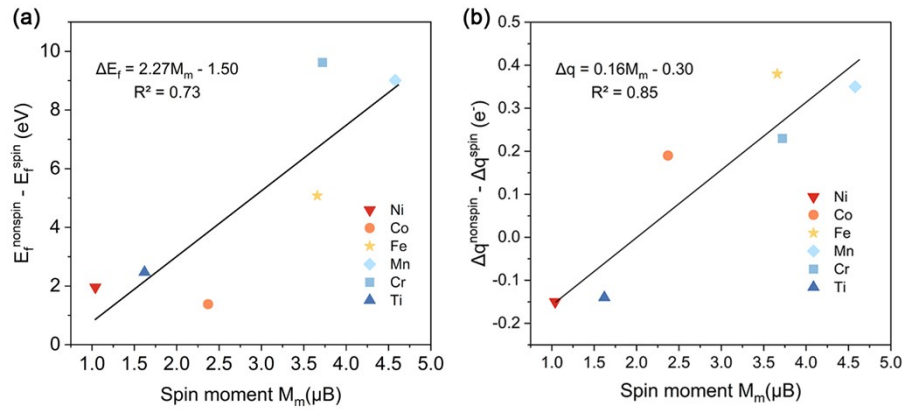

**Fig. S1** Relations between spin moment and (a) formation energy difference ( $\Delta E_f$ ), (b) the charge transfer difference ( $\Delta q$ ) from the metal atom to the coordinating atoms between spin-polarized and non-spin-polarized systems.

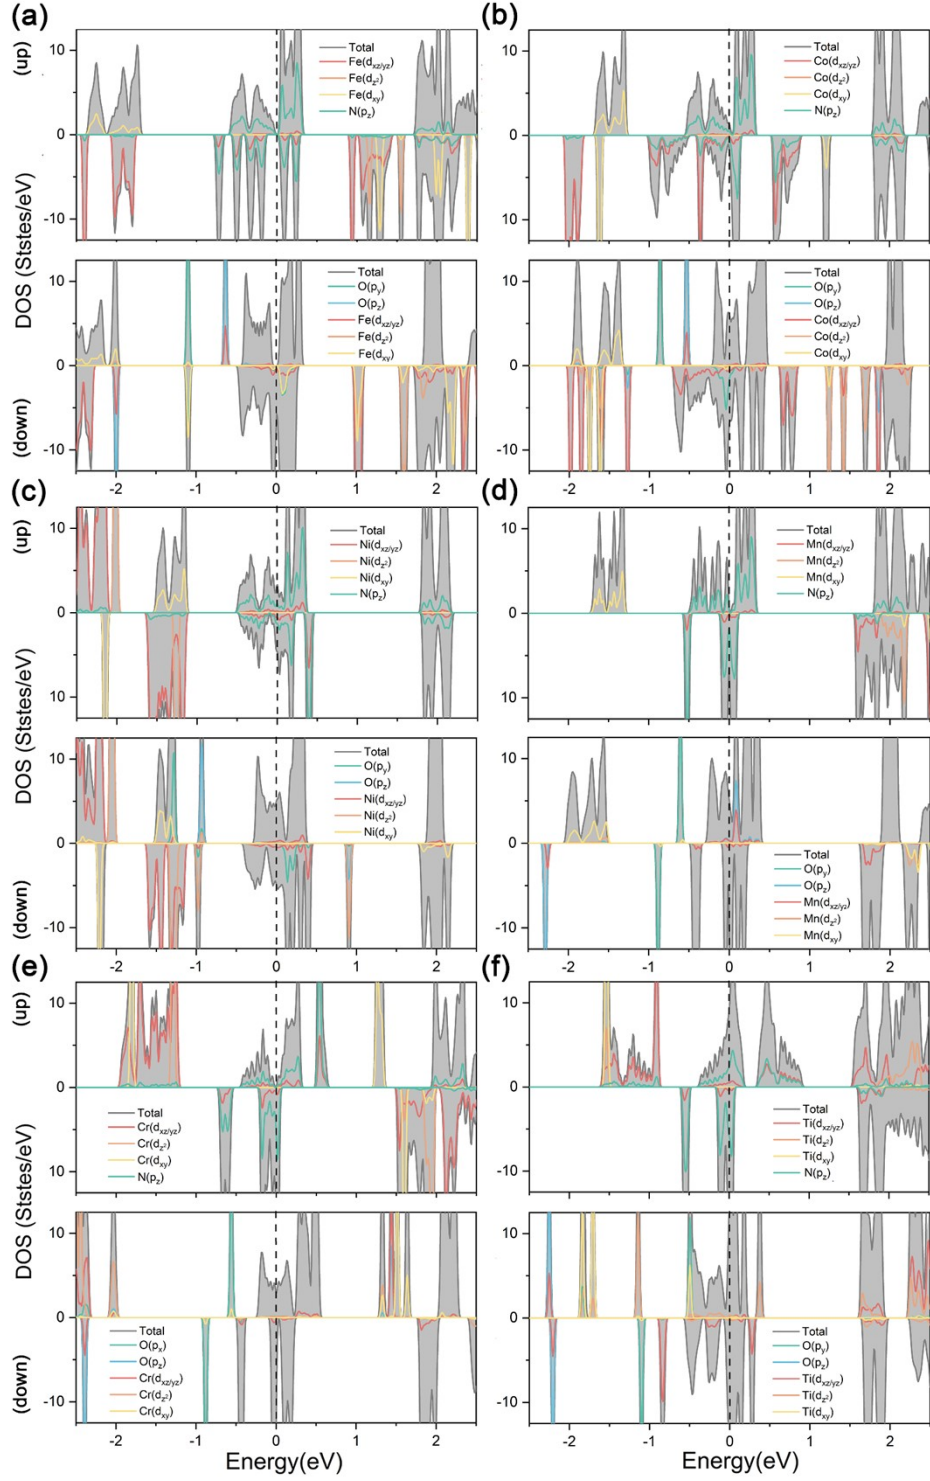

**Fig. S2** The density of state (DOS) of the X and N atoms in the spin-polarized (a)  $\text{Fe}_3(\text{HAT})_2$ , (b)  $\text{Co}_3(\text{HAT})_2$ , (c)  $\text{Ni}_3(\text{HAT})_2$ , (d)  $\text{Mn}_3(\text{HAT})_2$ , (e)  $\text{Cr}_3(\text{HAT})_2$ , (f)  $\text{Ti}_3(\text{HAT})_2$  monolayers, respectively. Spin-polarized  $\text{M}_3(\text{HAT})_2$  and  $\text{M}_3(\text{HAT})_2\text{-OO}$  are demonstrated above and below, respectively. The black dashed line at zero denotes the position of the Fermi level.

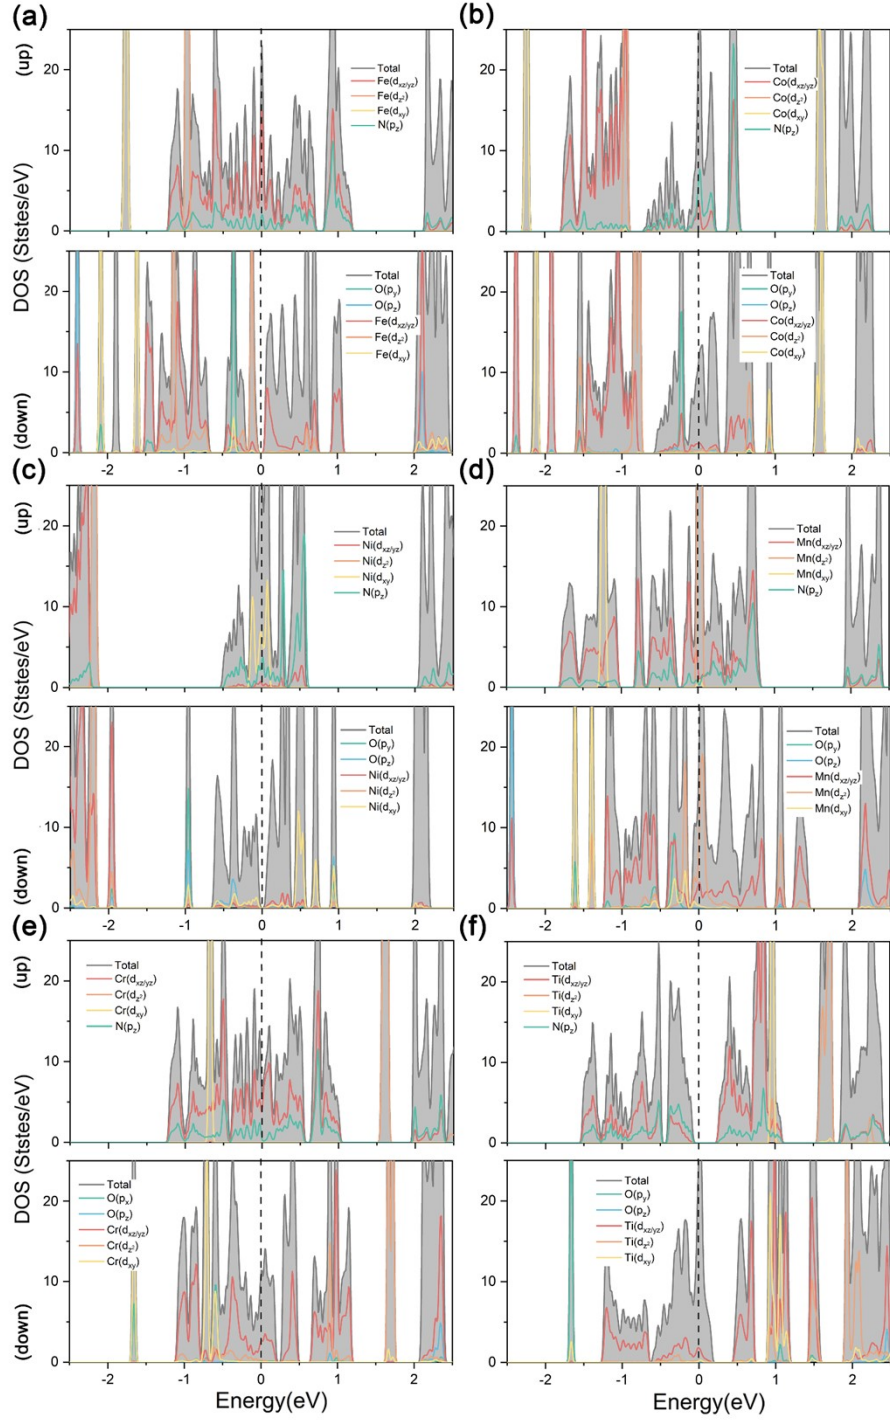

**Fig. S3** The density of state (DOS) of the nonspin-polarized (a)  $\text{Fe}_3(\text{HAT})_2$ , (b)  $\text{Co}_3(\text{HAT})_2$ , (c)  $\text{Ni}_3(\text{HAT})_2$ , (d)  $\text{Mn}_3(\text{HAT})_2$ , (e)  $\text{Cr}_3(\text{HAT})_2$ , (f)  $\text{Ti}_3(\text{HAT})_2$  monolayers, respectively. Nonspin-polarized  $\text{M}_3(\text{HAT})_2$  and  $\text{M}_3(\text{HAT})_2\text{-OO}$  are demonstrated above and below, respectively. The black dashed line at zero denotes the position of the Fermi level.

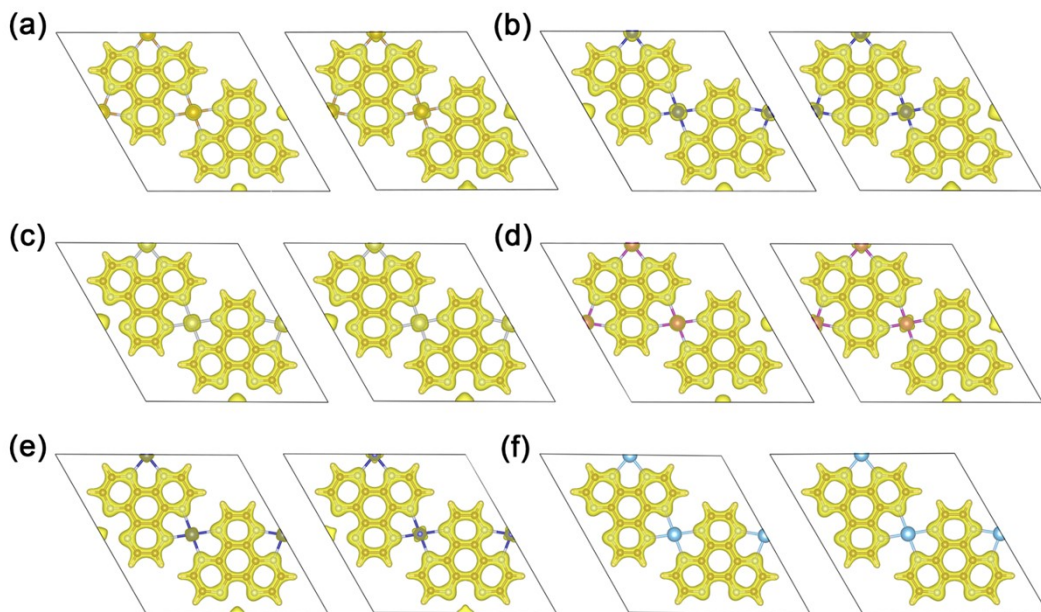

**Fig. S4** The charge density distribution of (a)  $\text{Fe}_3(\text{HAT})_2$ , (b)  $\text{Co}_3(\text{HAT})_2$ , (c)  $\text{Ni}_3(\text{HAT})_2$ , (d)  $\text{Mn}_3(\text{HAT})_2$ , (e)  $\text{Cr}_3(\text{HAT})_2$ , (f)  $\text{Ti}_3(\text{HAT})_2$  monolayers, respectively. Spin-polarized monolayers are on the left, and non-spin-polarized monolayers are on the right.

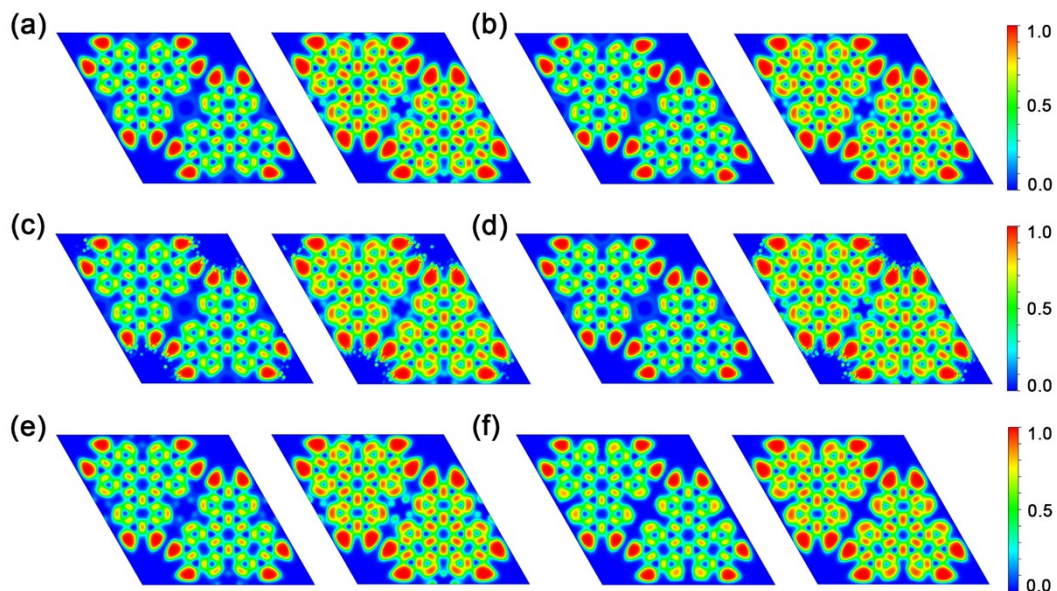

**Fig. S5** ELF of (a)  $\text{Fe}_3(\text{HAT})_2$ , (b)  $\text{Co}_3(\text{HAT})_2$ , (c)  $\text{Ni}_3(\text{HAT})_2$ , (d)  $\text{Mn}_3(\text{HAT})_2$ , (e)  $\text{Cr}_3(\text{HAT})_2$ , (f)  $\text{Ti}_3(\text{HAT})_2$  monolayers, respectively. Spin-polarized monolayers are on the left, and non-spin-polarized monolayers are on the right.

**Table S2** Gibbs free energy change ( $\Delta G$ ) and overpotentials ( $\eta$ ) of each elementary step for OER on  $M_3(\text{HAT})_2$  monolayers

|                             | Magnetic ground state | $\Delta G_1$ (eV) | $\Delta G_2$ (eV) | $\Delta G_3$ (eV) | $\Delta G_4$ (eV) | $\eta$ (V) |
|-----------------------------|-----------------------|-------------------|-------------------|-------------------|-------------------|------------|
| $\text{Fe}_3(\text{HAT})_2$ | spin                  | -0.74             | 1.61              | 1.63              | 2.43              | 1.20       |
|                             | nonspin               | -1.08             | 1.79              | 1.10              | 3.12              | 1.89       |
| $\text{Co}_3(\text{HAT})_2$ | spin                  | -0.26             | 1.22              | 1.83              | 2.14              | 0.91       |
|                             | nonspin               | 0.26              | 1.35              | 1.57              | 1.76              | 0.53       |
| $\text{Ni}_3(\text{HAT})_2$ | spin                  | 0.03              | 2.50              | 0.59              | 1.81              | 1.27       |
|                             | nonspin               | -0.44             | 1.30              | 1.65              | 2.42              | 1.19       |
| $\text{Mn}_3(\text{HAT})_2$ | spin                  | 1.52              | -0.61             | 3.84              | 0.18              | 2.61       |
|                             | nonspin               | -1.05             | 0.61              | 2.26              | 3.11              | 1.88       |
| $\text{Cr}_3(\text{HAT})_2$ | spin                  | 0.06              | 1.41              | 1.68              | 1.77              | 0.54       |
|                             | nonspin               | -0.77             | 1.1               | 2.29              | 2.30              | 1.07       |
| $\text{Ti}_3(\text{HAT})_2$ | spin                  | -1.10             | 0.49              | 2.88              | 3.00              | 1.77       |
|                             | nonspin               | -1.40             | 0.04              | 3.13              | 3.14              | 1.91       |

**Table S3** The spin moment, adsorption energy difference, variations of charge difference (after and before O<sub>2</sub> adsorption), the difference of charge transfer between non-spin-polarized M<sub>3</sub>(HAT)<sub>2</sub> and spin-polarized M<sub>3</sub>(HAT)<sub>2</sub> of O<sub>2</sub> adsorbed M<sub>3</sub>(HAT)<sub>2</sub> systems.

|                                | Ni <sub>3</sub> (HAT) <sub>2</sub> | Co <sub>3</sub> (HAT) <sub>2</sub> | Fe <sub>3</sub> (HAT) <sub>2</sub> | Mn <sub>3</sub> (HAT) <sub>2</sub> | Cr <sub>3</sub> (HAT) <sub>2</sub> | Ti <sub>3</sub> (HAT) <sub>2</sub> |
|--------------------------------|------------------------------------|------------------------------------|------------------------------------|------------------------------------|------------------------------------|------------------------------------|
| $\Delta M_m$ ( $\mu_B$ )       | 1.50                               | 2.35                               | 3.94                               | 4.24                               | 3.05                               | 1.01                               |
| $E_{OO}^{nonspin}$ (eV)        | -1.94                              | -1.10                              | -2.80                              | -3.02                              | -2.85                              | -4.06                              |
| $E_{OO}^{spin}$ (eV)           | -1.30                              | -0.34                              | -1.82                              | -1.88                              | -1.77                              | -3.19                              |
| $\Delta E_{OO}$ (eV)           | -0.64                              | -0.76                              | -0.98                              | -1.14                              | -1.08                              | -0.87                              |
| $\Delta q^{nonspin}$ ( $e^-$ ) | 0.03                               | -0.04                              | 0.01                               | 0.03                               | -0.07                              | -0.04                              |
| $\Delta q^{spin}$ ( $e^-$ )    | 0.05                               | -0.04                              | -0.23                              | -0.08                              | -0.19                              | 0.00                               |
| $\Delta q$ ( $e^-$ )           | -0.02                              | 0.00                               | 0.24                               | 0.11                               | 0.12                               | -0.04                              |

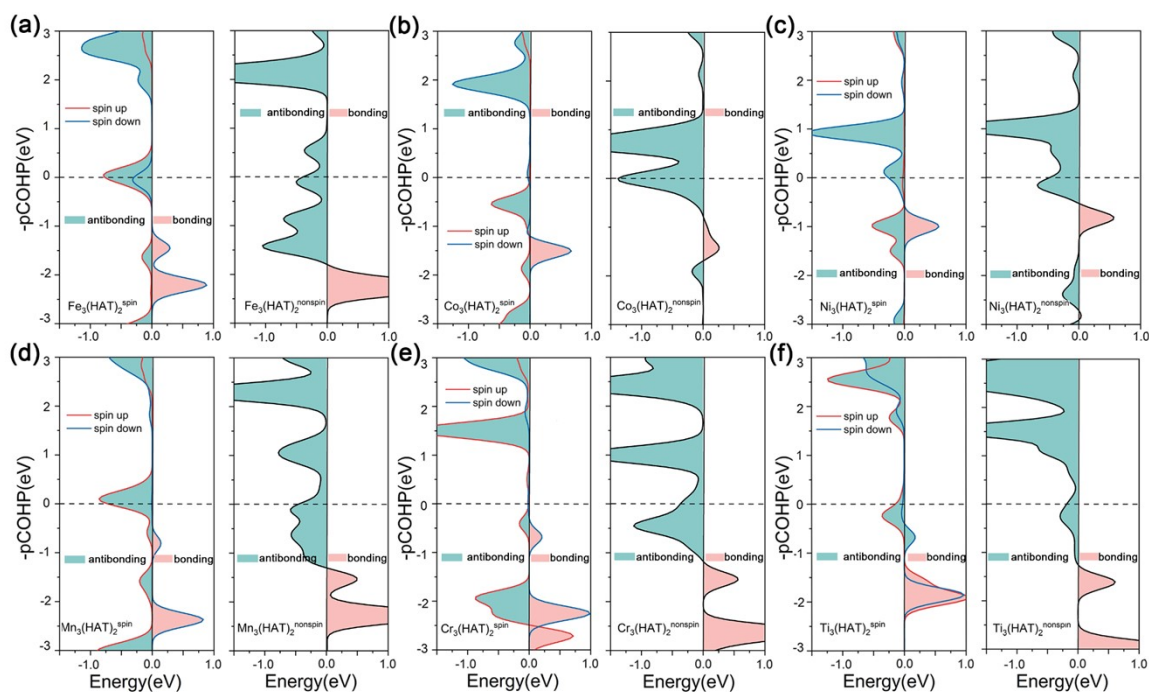

**Fig. S6** The orbital contribution of pCOHP between M atoms (Fe, Co, Ni, Mn, Cr and Ti) and intermediates OO\* on M<sub>3</sub>(HAT)<sub>2</sub>.

**Table S4** The value of ICOHP between central metal atoms and the adsorption intermediate species OO\*.

|                | Ni <sub>3</sub> (HAT) <sub>2</sub> | Co <sub>3</sub> (HAT) <sub>2</sub> | Fe <sub>3</sub> (HAT) <sub>2</sub> | Mn <sub>3</sub> (HAT) <sub>2</sub> | Cr <sub>3</sub> (HAT) <sub>2</sub> | Ti <sub>3</sub> (HAT) <sub>2</sub> |
|----------------|------------------------------------|------------------------------------|------------------------------------|------------------------------------|------------------------------------|------------------------------------|
| nonspin        | -2.63                              | -2.35                              | -2.35                              | -2.60                              | -3.18                              | -3.62                              |
| spin           | -1.57                              | -1.31                              | -1.88                              | -1.91                              | -2.83                              | -3.10                              |
| $\Delta$ ICOHP | -1.06                              | -1.04                              | -0.47                              | -0.69                              | -0.35                              | -0.52                              |

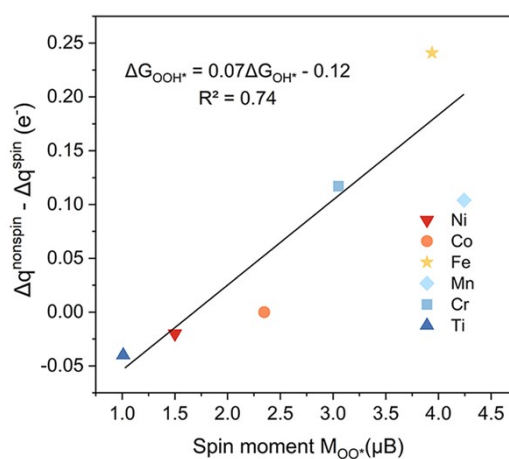

**Fig. S7** Correlation between spin moment and the charge difference between M atom and O ( $\Delta q$ ).

## References

- 1 Kresse and Hafner, *Phys. Rev. B: Condens. Matter*, 1993, **47**, 558-561.
- 2 Kresse and Furthmüller, *Phys. Rev. B: Condens. Matter*, 1996, **54**, 11169-11186.
- 3 Blochl, *Phys. Rev. B: Condens. Matter*, 1994, **50**, 17953-17979.
- 4 Perdew, Burke and Ernzerhof, *Phys. Rev. Lett.*, 1996, **77**, 3865-3868.
- 5 M. Capdevila-Cortada, Z. Łodziana and N. López, *ACS Catal.*, 2016, **6**, 8370-8379.
- 6 J. Zhou and Q. Sun, *J. Am. Chem. Soc.*, 2011, **133**, 15113-15119.

- 7 M. Aykol and C. Wolverton, *Phys. Rev. B*, 2014, **90**, 115105.
- 8 L. Wang, T. Maxisch and G. Ceder, *Phys. Rev. B*, 2006, **73**, 195107.
- 9 J. Geng, R. Wu, H. Bai, I.-N. Chan, K. W. Ng, W. F. Ip and H. Pan, *Int. J. Hydrogen Energy*, 2022, **47**, 18725-18737.
- 10 S. Grimme, J. Antony, S. Ehrlich and H. Krieg, *J. Chem. Phys.*, 2010, **132**, 154104.
- 11 J. Rossmeisl, A. Logadottir and J. K. Nørskov, *Chem. Phys.*, 2005, **319**, 178-184.
